# Supplementary material for: Alpha7 nicotinic acetylcholine receptor is required for amyloid pathology in brain endothelial cells induced by Glycoprotein 120, methamphetamine and nicotine
Source: PubMed Central journal article supplement (PMC5225415; doi:10.1038/srep40467), 2017-01-11

**Alpha7 nicotinic acetylcholine receptor is required for amyloid pathology in brain endothelial cells induced by Glycoprotein 120, methamphetamine and nicotine**

Liqun Liu<sup>1, 2</sup>, Jingyi Yu<sup>2, 3</sup>, Li Li<sup>3, 4</sup>, Bao Zhang<sup>2, 3</sup>, Lingjuan Liu<sup>1</sup>, Chun-Hua Wu<sup>2</sup>,  
Ambrose Jong<sup>2</sup>, Ding-An Mao<sup>1\*</sup>, Sheng-He Huang<sup>2, 3\*</sup>

Figure 3a

A $\beta$

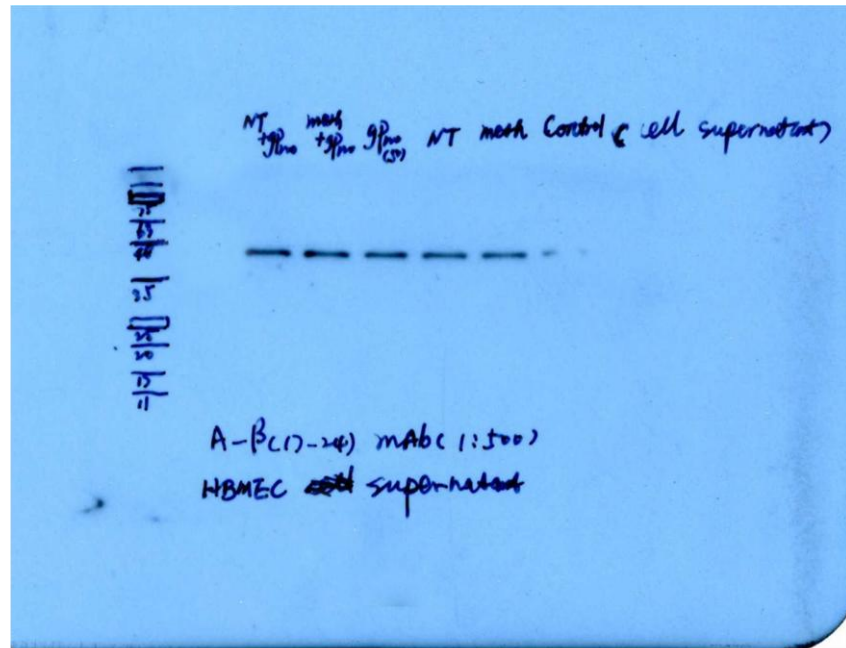

$\beta$ -actin

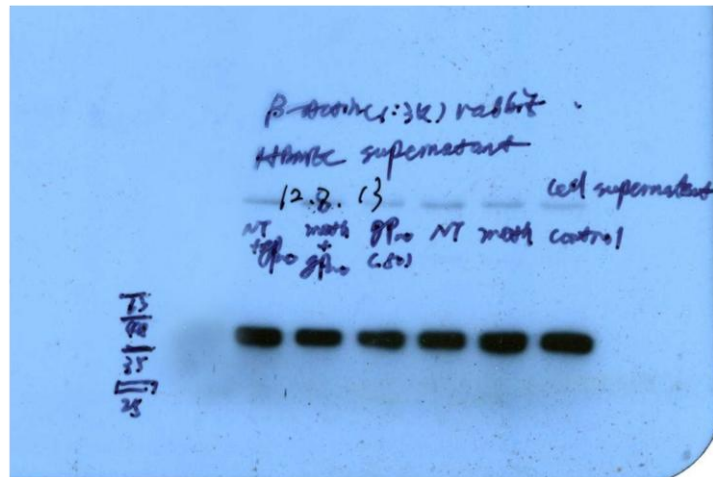

Figure 3b

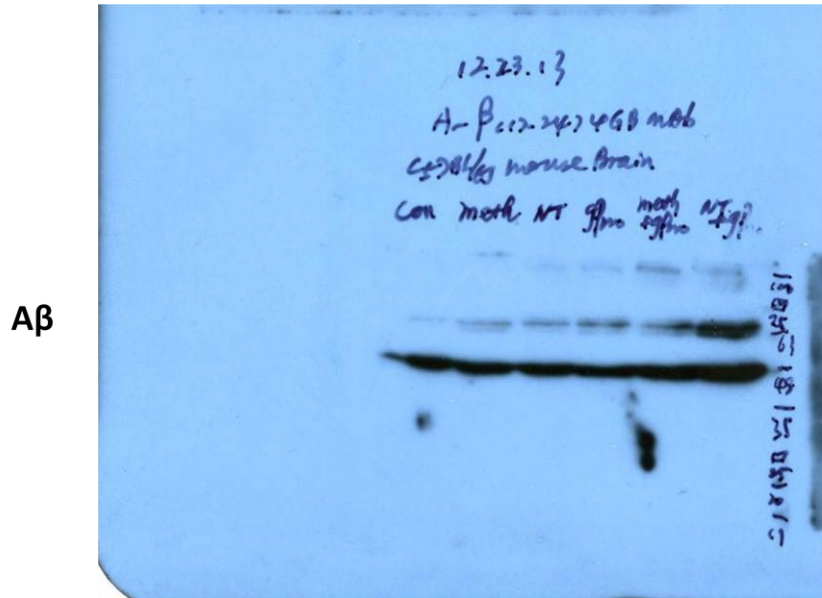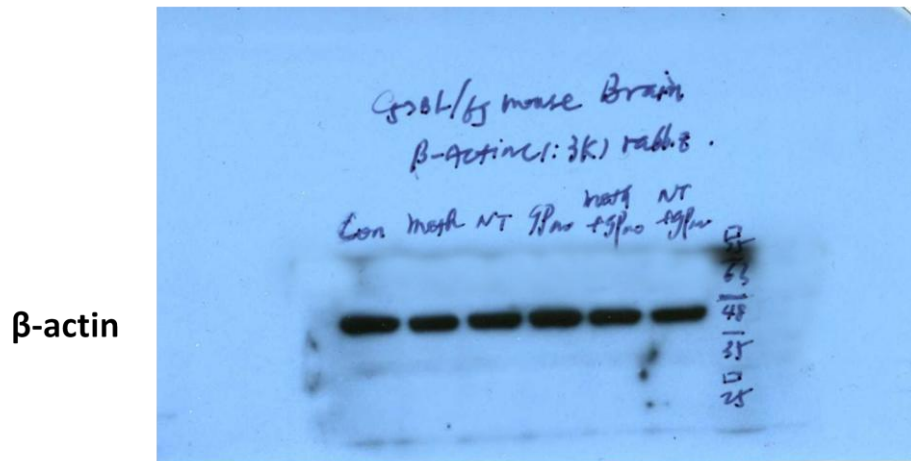

Figure 4a

AchR7, S100B, Tau, RAGE protein expression in HBMEC

after treatment with gp120 (50ng/ml) ( 0h, 2h, 6h, 24h )

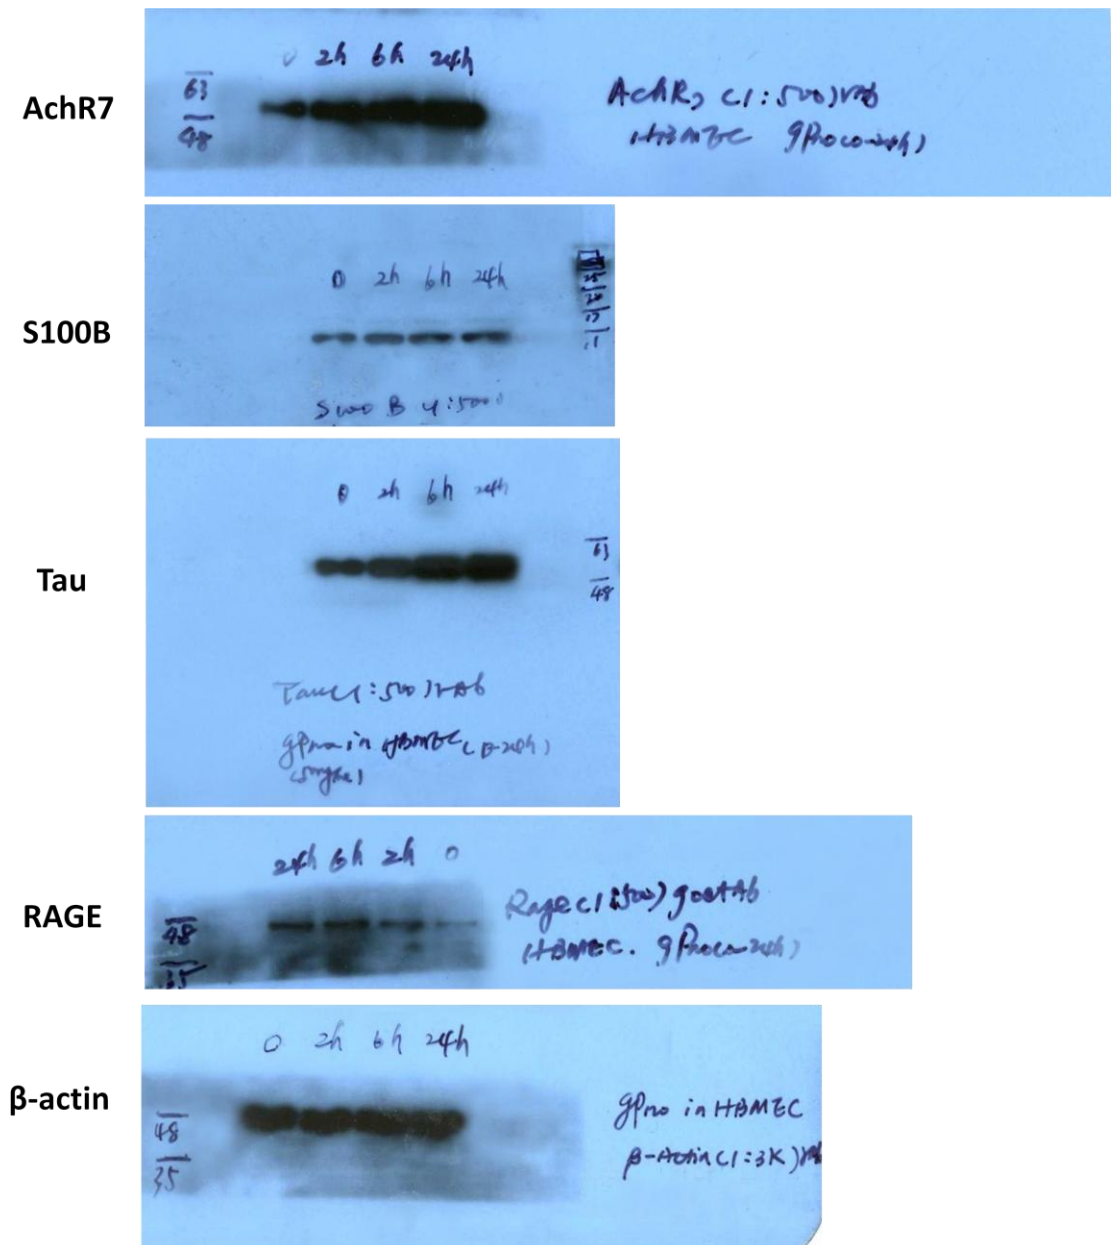

Figure 4b

AchR7, S100B, Tau, RAGE protein expression in HBMEC  
after treatment with METH(50nM) ( 0h, 2h, 6h, 24h )

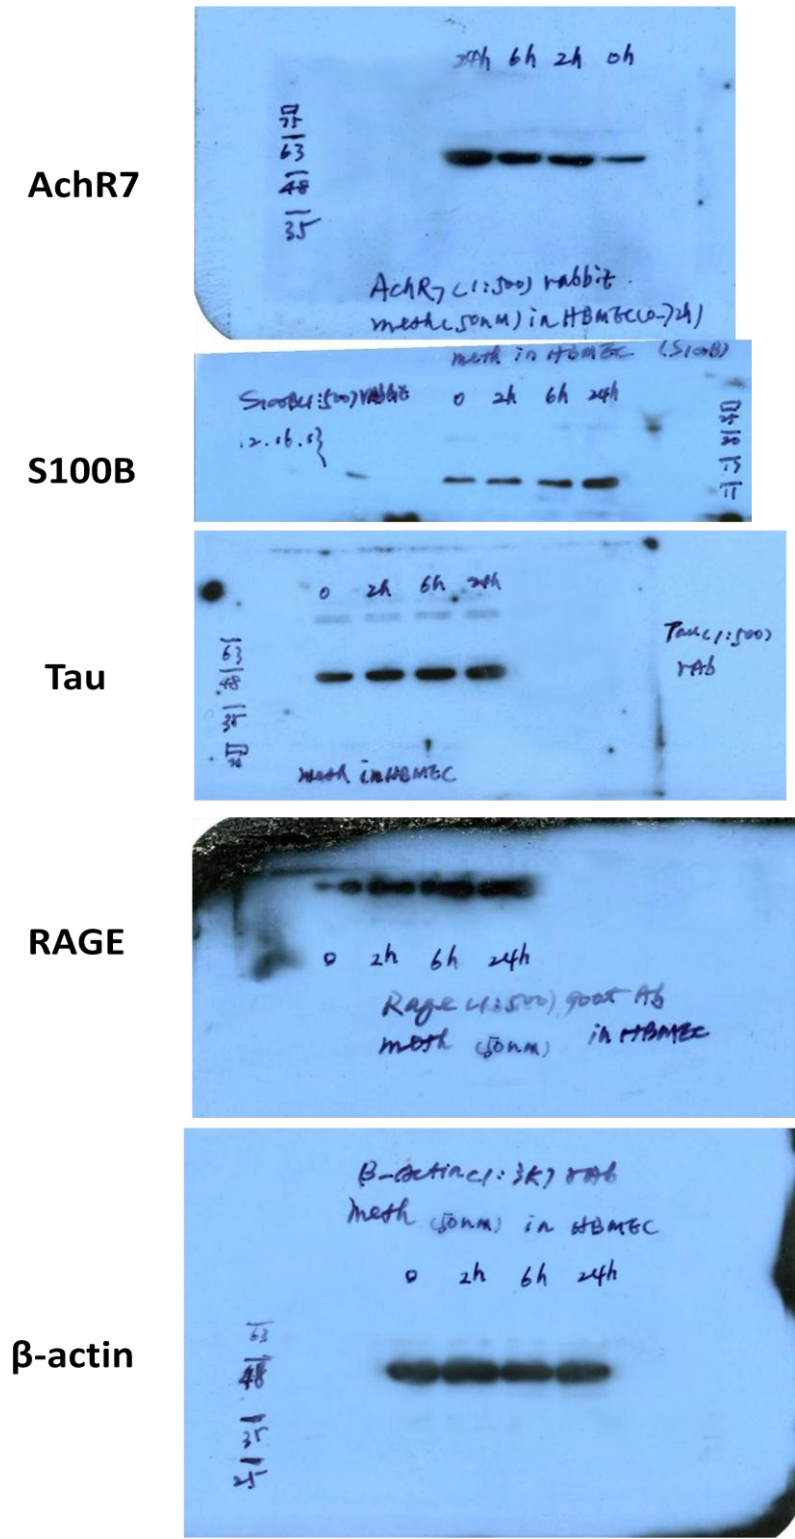

Supplement: srep40467-s1.pdf [file srep40467-s1.pdf]
